# Supplementary material for: Genome-wide identification and expression analysis of the trihelix transcription factor family in tartary buckwheat (Fagopyrum tataricum)
Source: BMC Plant Biol. 2019 Aug 7;19:344. doi: 10.1186/s12870-019-1957-x (PMC6686422; doi:10.1186/s12870-019-1957-x)
Supplement: Supplementary file 3 — Table S3. One-to-one orthologous relationships between tartary buckwheat and other plants. (XLS 99 kb) [file 12870_2019_1957_MOESM3_ESM.xls]

## Sheet: Tarary buckwheat-Arabidopsis
Supplementary Table 3 One-to-one orthologous relationships between tartary buckwheat and Arabidopsis.
FtTH Gene Name	FtTH Gene ID	AtTH Gene ID
FtTH6	FtPinG0005482700.01	AT5G63420.1
FtTH16	FtPinG0004172200.01	AT3G24860.1

## Sheet: Tartary buckwheat-Cacao
Supplementary Table 3 One-to-one orthologous relationships between tartary buckwheat and Theobroma cacao.
FtTH Gene Name	FtTH Gene ID	TcTH Gene ID
FtTH6	FtPinG0005482700.01	EOY22451
FtTH3	FtPinG0003208600.01	EOY08082
FtTH5	FtPinG0005803200.01	EOY07183
FtTH8	FtPinG0008851000.01	EOY26726
FtTH4	FtPinG0005811400.01	EOY16705
FtTH7	FtPinG0002549300.01	EOY16708
FtTH11	FtPinG0003808400.01	EOY07183
FtTH10	FtPinG0003663600.01	EOY08130
FtTH9	FtPinG0009667000.01	EOY16708
FtTH16	FtPinG0004172200.01	EOX93926
FtTH14	FtPinG0001222000.01	EOY27995
FtTH15	FtPinG0002123600.01	EOY16705
FtTH18	FtPinG0007435600.01	EOY17721
FtTH19	FtPinG0005441400.01	EOY28998
FtTH26	FtPinG0006827100.01	EOX92393
FtTH27	FtPinG0002755100.01	EOY16708
FtTH31	FtPinG0003268900.01	EOY08130
FtTH28	FtPinG0002312100.01	EOY27995

## Sheet: Tartary buckwheat-Beta vulgaris
Supplementary Table 3 One-to-one orthologous relationships between tartary buckwheat and Beta vulgaris.
FtTH Gene Name	FtTH Gene ID	BvTH Gene ID
FtTH7	FtPinG0002549300.01	KMT19527
FtTH6	FtPinG0005482700.01	KMT11214
FtTH5	FtPinG0005803200.01	KMT12337
FtTH3	FtPinG0003208600.01	KMT06386
FtTH8	FtPinG0008851000.01	KMT00781
FtTH9	FtPinG0009667000.01	KMT19527
FtTH11	FtPinG0003808400.01	KMT12337
FtTH10	FtPinG0003663600.01	KMT06332
FtTH16	FtPinG0004172200.01	KMT05622
FtTH14	FtPinG0001222000.01	KMT04413
FtTH18	FtPinG0007435600.01	KMT18171
FtTH19	FtPinG0005441400.01	KMT04365
FtTH26	FtPinG0006827100.01	KMT09223
FtTH23	FtPinG0006724200.01	KMT04779
FtTH27	FtPinG0002755100.01	KMT19527
FtTH31	FtPinG0003268900.01	KMT06332
FtTH28	FtPinG0002312100.01	KMT04413

## Sheet: Tartary buckwheat-Glycine max
Supplementary Table 3 One-to-one orthologous relationships between tartary buckwheat and Glycine max.
FtTH Gene Name	FtTH Gene ID	GmTH Gene ID
FtTH3	FtPinG0003208600.01	KRH32635
FtTH7	FtPinG0002549300.01	KRH35147
FtTH3	FtPinG0003208600.01	KRH20012
FtTH8	FtPinG0008851000.01	KRH23480
FtTH8	FtPinG0008851000.01	KRH09846
FtTH7	FtPinG0002549300.01	KRH08698
FtTH4	FtPinG0005811400.01	KRH08700
FtTH5	FtPinG0005803200.01	KRH00260
FtTH7	FtPinG0002549300.01	KRH70307
FtTH7	FtPinG0002549300.01	KRG91649
FtTH7	FtPinG0002549300.01	KRH64101
FtTH5	FtPinG0005803200.01	KRH65719
FtTH6	FtPinG0005482700.01	KRH63749
FtTH6	FtPinG0005482700.01	KRH54201
FtTH5	FtPinG0005803200.01	KRH49393
FtTH10	FtPinG0003663600.01	KRH32666
FtTH9	FtPinG0009667000.01	KRH08698
FtTH11	FtPinG0003808400.01	KRH00260
FtTH10	FtPinG0003663600.01	KRG96146
FtTH9	FtPinG0009667000.01	KRH70307
FtTH10	FtPinG0003663600.01	KRH67857
FtTH11	FtPinG0003808400.01	KRH65719
FtTH11	FtPinG0003808400.01	KRH49393
FtTH15	FtPinG0002123600.01	KRH35150
FtTH14	FtPinG0001222000.01	KRH21272
FtTH14	FtPinG0001222000.01	KRH11016
FtTH15	FtPinG0002123600.01	KRG91648
FtTH19	FtPinG0005441400.01	KRH11595
FtTH19	FtPinG0005441400.01	KRH36613
FtTH21	FtPinG0005746300.01	KRH34074
FtTH21	FtPinG0005746300.01	KRG96954
FtTH21	FtPinG0005746300.01	KRH68713
FtTH26	FtPinG0006827100.01	KRH64101
FtTH26	FtPinG0006827100.01	KRH53849
FtTH23	FtPinG0006724200.01	KRH47662
FtTH27	FtPinG0002755100.01	KRH35148
FtTH27	FtPinG0002755100.01	KRH08698
FtTH27	FtPinG0002755100.01	KRG91649
FtTH27	FtPinG0002755100.01	KRH70307
FtTH31	FtPinG0003268900.01	KRH32666
FtTH30	FtPinG0003298900.01	KRH27047
FtTH30	FtPinG0003298900.01	KRH22283
FtTH28	FtPinG0002312100.01	KRH21272
FtTH28	FtPinG0002312100.01	KRH11016
FtTH31	FtPinG0003268900.01	KRG96146
FtTH31	FtPinG0003268900.01	KRH67857

## Sheet: Tartary buckwheat-Tomato
Supplementary Table 3 One-to-one orthologous relationships between tartary buckwheat and solanum lycopersicum.
FtTH Gene Name	FtAP2/ERF Gene ID	SlTH Gene ID
FtTH8	FtPinG0008851000.01	Solyc12g043090.1.1
FtTH6	FtPinG0005482700.01	Solyc03g111260.2.1
FtTH7	FtPinG0002549300.01	Solyc04g071360.2.1
FtTH3	FtPinG0003208600.01	Solyc09g008850.2.1
FtTH9	FtPinG0009667000.01	Solyc04g071360.2.1
FtTH10	FtPinG0003663600.01	Solyc09g009250.2.1
FtTH11	FtPinG0003808400.01	Solyc09g005560.2.1
FtTH14	FtPinG0001222000.01	Solyc02g076810.2.1
FtTH16	FtPinG0004172200.01	Solyc06g083430.1.1
FtTH19	FtPinG0005441400.01	Solyc11g012720.1.1
FtTH18	FtPinG0007435600.01	Solyc06g051120.2.1
FtTH26	FtPinG0006827100.01	Solyc11g005380.1.1
FtTH23	FtPinG0006724200.01	Solyc03g122030.1.1
FtTH27	FtPinG0002755100.01	Solyc04g071360.2.1
FtTH30	FtPinG0003298900.01	Solyc12g010890.1.1
FtTH28	FtPinG0002312100.01	Solyc02g076810.2.1
FtTH30	FtPinG0003298900.01	Solyc02g076810.2.1
FtTH29	FtPinG0002170700.01	Solyc04g071360.2.1
FtTH30	FtPinG0003298900.01	Solyc07g055100.2.1

## Sheet: Tartary buckwheat-Vitisvinifera
Supplementary Table 3 One-to-one orthologous relationships between tartary buckwheat and Vitis vinifera.
FtTH Gene Name	FtTH Gene ID	VvTH Gene ID
FtTH6	FtPinG0005482700.01	VIT_17s0000g01640
FtTH4	FtPinG0005811400.01	VIT_18s0072g00690
FtTH3	FtPinG0003208600.01	VIT_08s0007g04160
FtTH8	FtPinG0008851000.01	VIT_09s0002g04700
FtTH9	FtPinG0009667000.01	VIT_18s0072g00670
FtTH10	FtPinG0003663600.01	VIT_08s0007g03820
FtTH11	FtPinG0003808400.01	VIT_08s0105g00400
FtTH14	FtPinG0001222000.01	VIT_10s0003g01300
FtTH14	FtPinG0002123600.01	VIT_18s0072g00690
FtTH18	FtPinG0007435600.01	VIT_13s0067g01440
FtTH21	FtPinG0005746300.01	VIT_14s0030g01860
FtTH23	FtPinG0006724200.01	VIT_09s0002g00720
FtTH28	FtPinG0002312100.01	VIT_10s0003g01300
FtTH30	FtPinG0003298900.01	VIT_10s0003g01300
FtTH30	FtPinG0003298900.01	VIT_12s0028g02150
FtTH28	FtPinG0002312100.01	VIT_12s0028g02150
FtTH31	FtPinG0003268900.01	VIT_08s0007g03820

## Sheet: Tartary buckwheat-Helianthus
Supplementary Table 3 One-to-one orthologous relationships between tartary buckwheat and helianthus annuus.
FtTH Gene Name	FtTH Gene ID	HaTH Gene ID
FtTH3	FtPinG0003208600.01	OTG01255
FtTH8	FtPinG0008851000.01	OTF90560
FtTH8	FtPinG0008851000.01	OTG16790
FtTH19	FtPinG0005441400.01	OTF91880
FtTH25	FtPinG0008111900.01	OTG38290
